# Supplementary material for: Molecular Tuning in Diaryl-Capped Pyrrolo[2,3-d:5,4-d′]bisthiazoles: Effects of Terminal Aryl Unit and Comparison to Dithieno[3,2-b:2′,3′-d]pyrrole Analogues
Source: MDPI journal article supplement (doi:10.3390/molecules27196638), 2022-10-06
Supplement: s1 [file s1]

# Molecular Tuning in Diaryl-capped Pyrrolo-[2,3-*d*:5,4-*d'*]bisthiazoles: Effects of Terminal Aryl Unit and Comparison to Dithieno[3,2-*b*:2',3'-*d*]pyrrole Analogues

Eric J. Uzelac, Irene Badía-Domínguez, Spencer J. Gilman, M. Carmen Ruiz Delgado and Seth C. Rasmussen \*

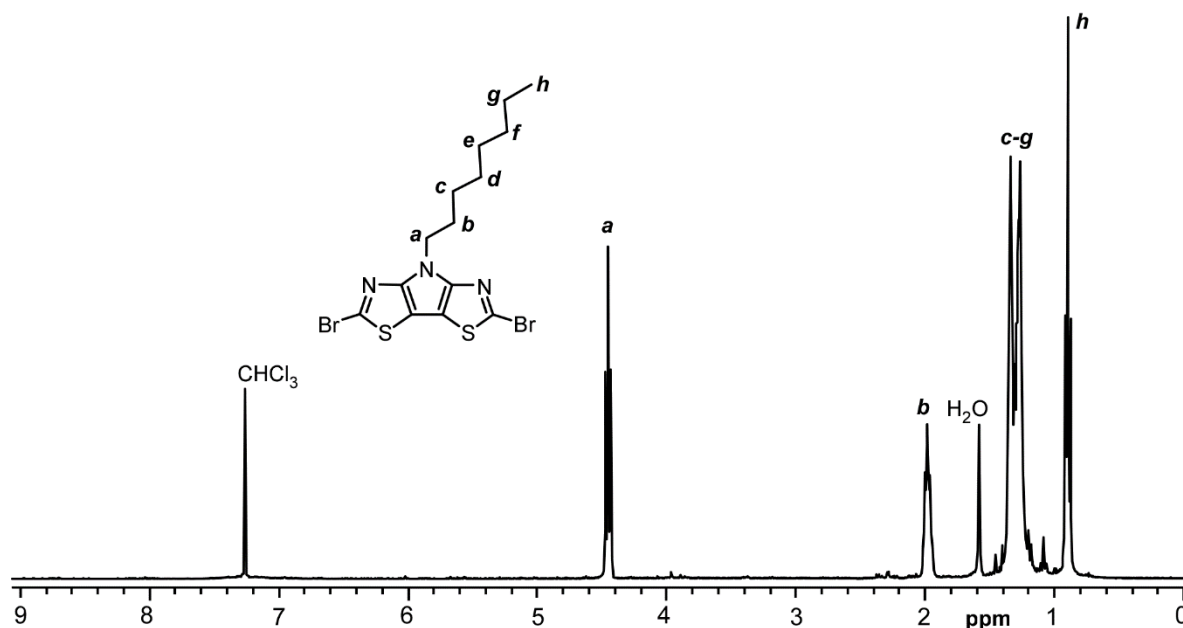

Figure S1.  $^1\text{H}$  NMR Spectrum of 2,6-dibromo-4-octyl-4*H*-pyrrolo[2,3-*d*:5,4-*d'*]bisthiazole.

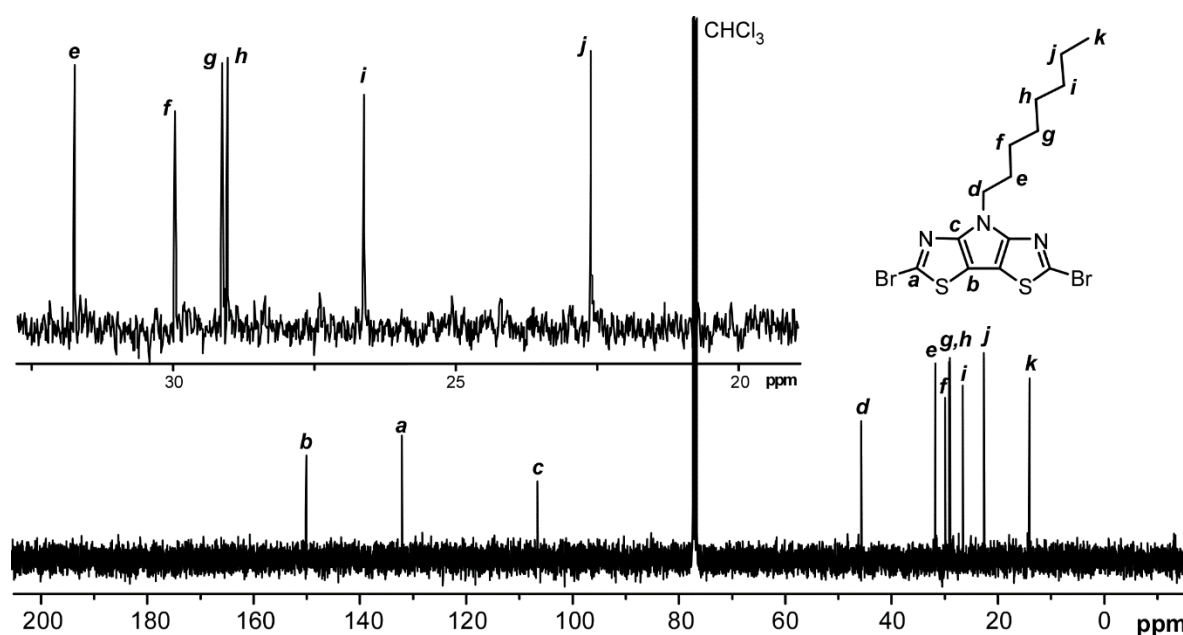

Figure S2.  $^{13}\text{C}$  NMR Spectrum of 2,6-dibromo-4-octyl-4*H*-pyrrolo[2,3-*d*:5,4-*d'*]bisthiazole.

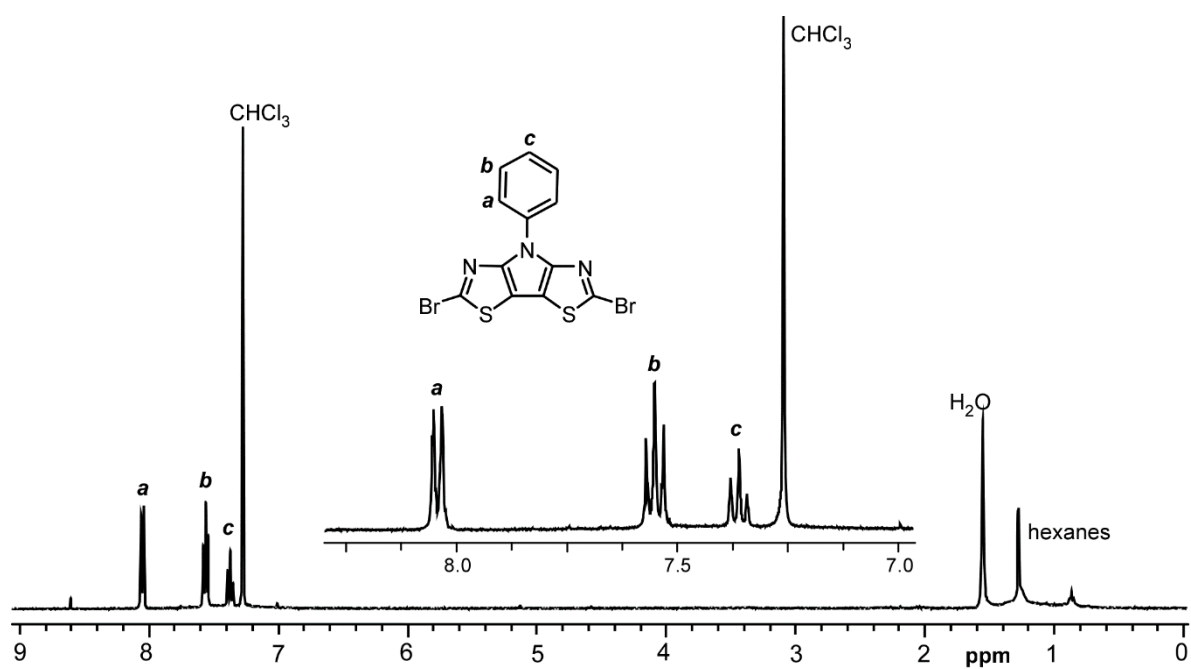

**Figure S3.**  $^1\text{H}$  NMR Spectrum of 2,6-dibromo-4-phenyl-4*H*-pyrrolo[2,3-*d*:5,4-*d'*]bisthiazole.

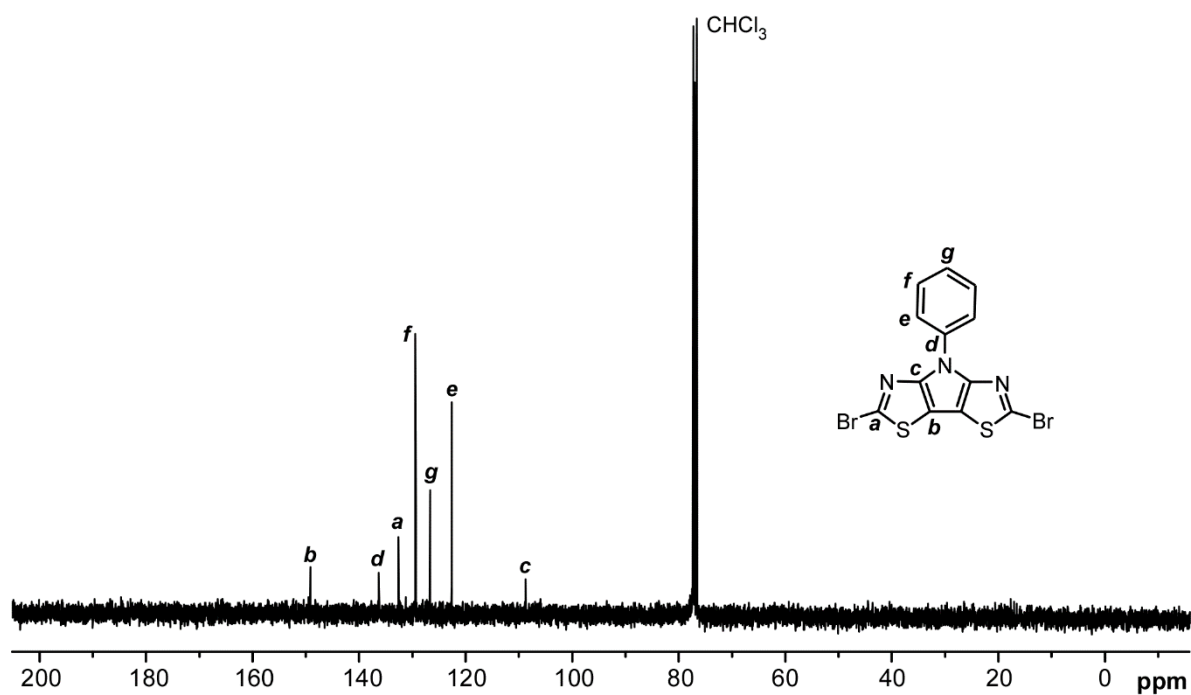

**Figure S4.**  $^{13}\text{C}$  NMR Spectrum of 2,6-dibromo-4-phenyl-4*H*-pyrrolo[2,3-*d*:5,4-*d'*]bisthiazole.

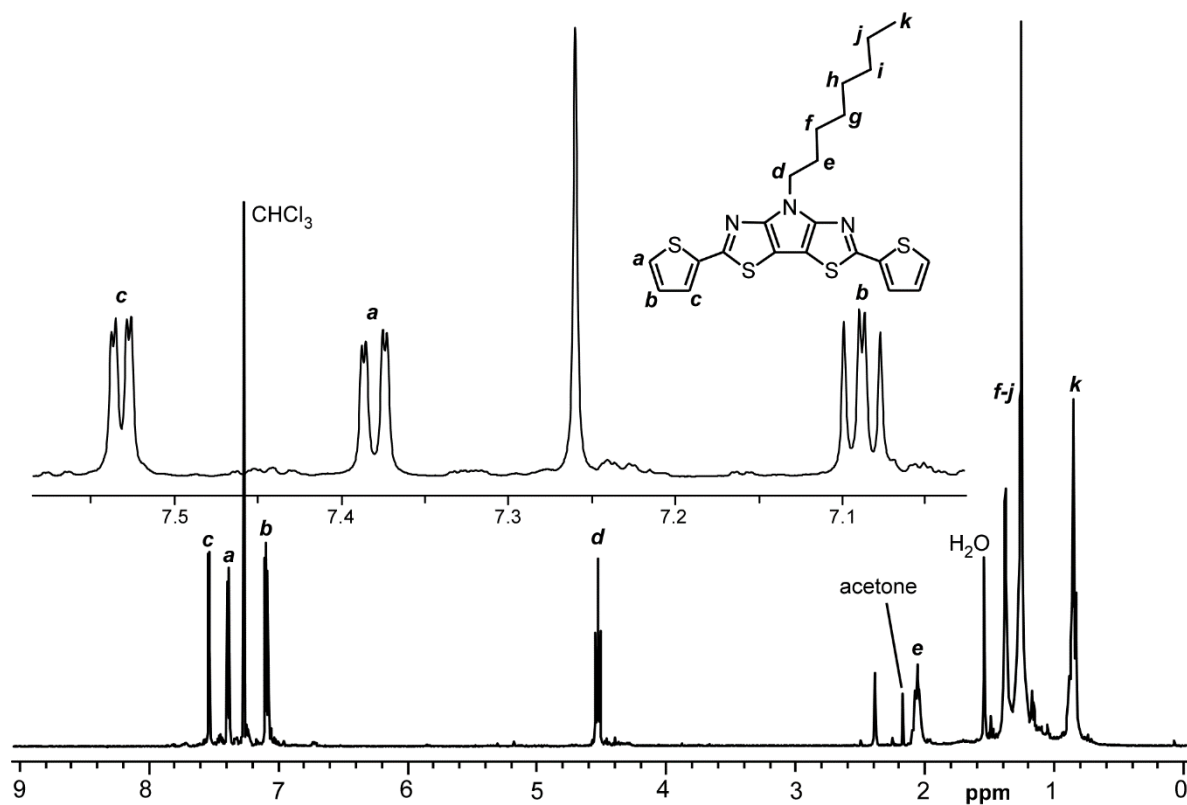

Figure S5. <sup>1</sup>H NMR Spectrum of 4-octyl-2,6-bis(2-thienyl)-4H-pyrrolo[2,3-d:5,4-d']bisthiazole.

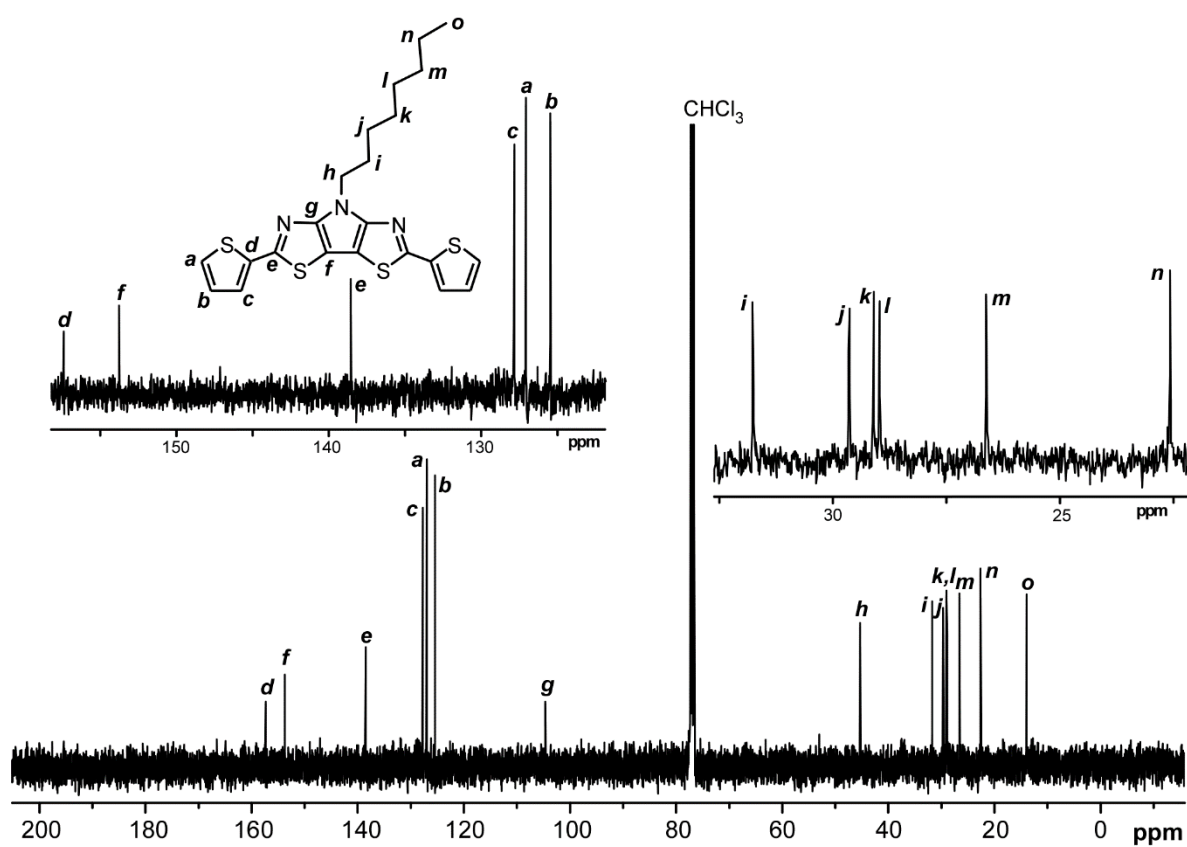

Figure S6. <sup>13</sup>C NMR Spectrum of 4-octyl-2,6-bis(2-thienyl)-4H-pyrrolo[2,3-d:5,4-d']bisthiazole.

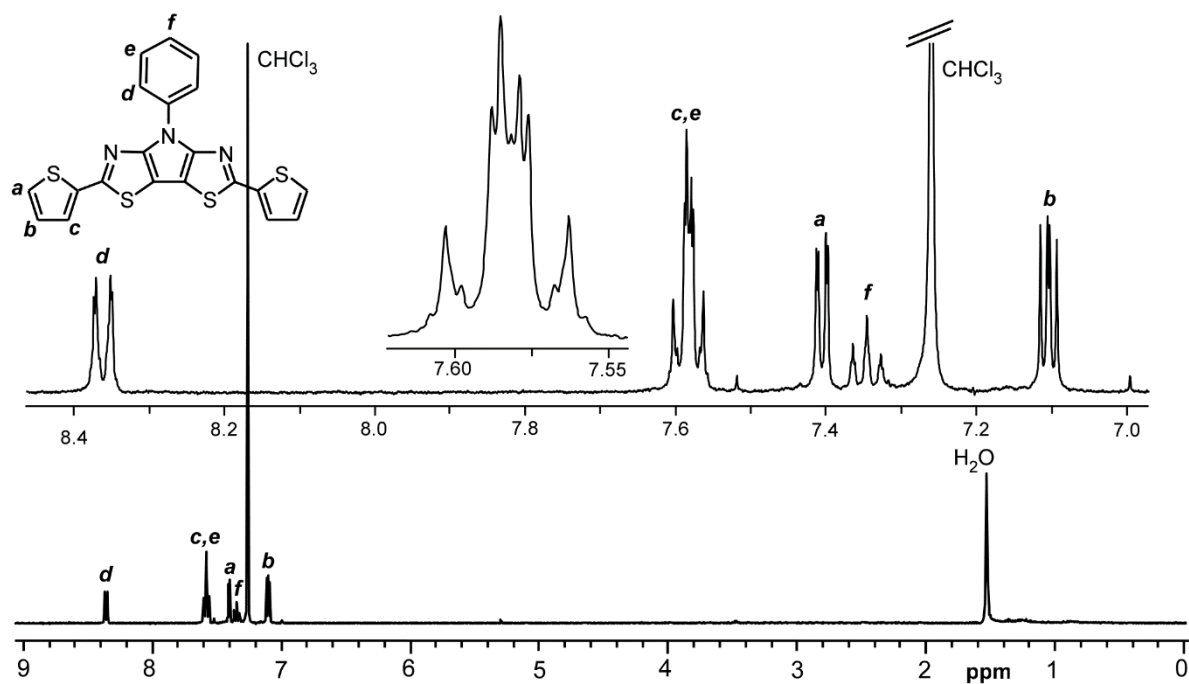

**Figure S7.**  $^1\text{H}$  NMR Spectrum of 4-phenyl-2,6-bis(2-thienyl)-4H-pyrrolo[2,3-d:5,4-d']bisthiazole.

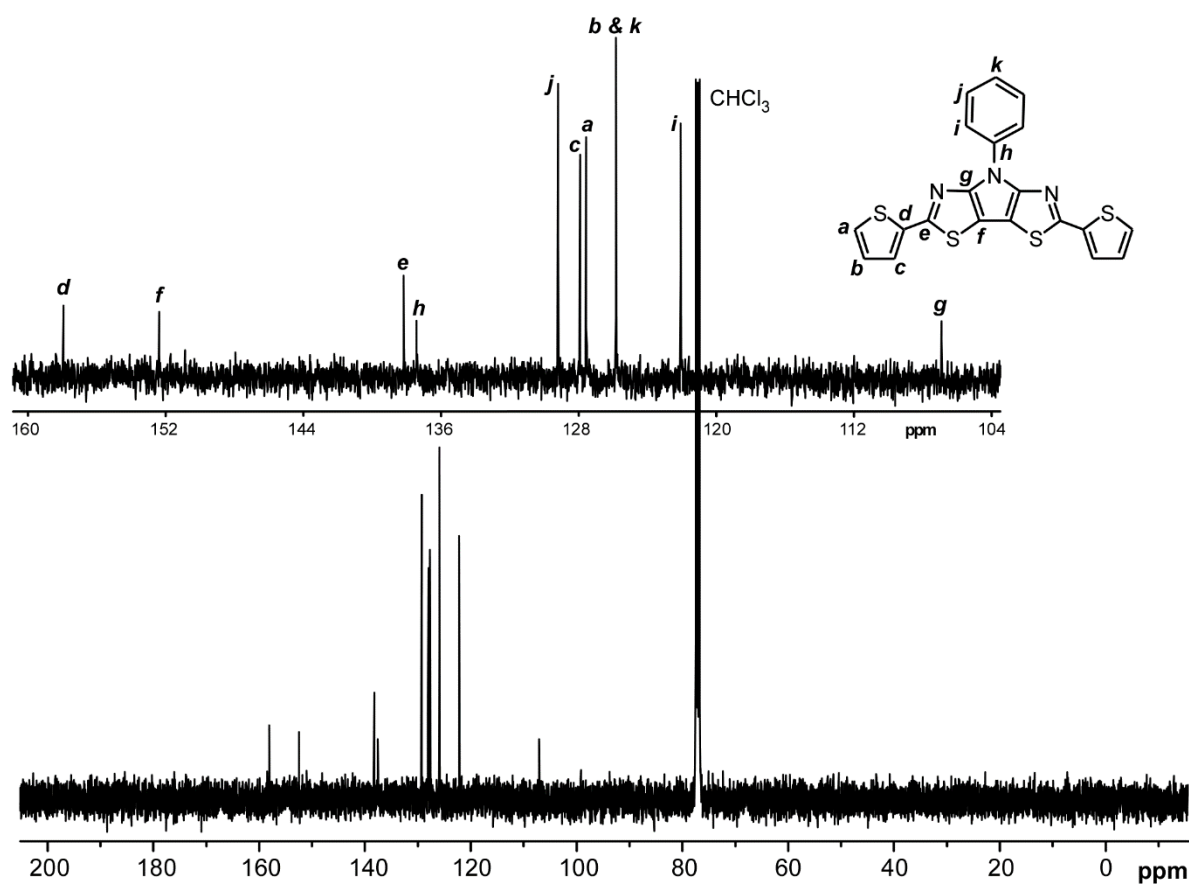

**Figure S8.**  $^{13}\text{C}$  NMR Spectrum of 4-phenyl-2,6-bis(2-thienyl)-4H-pyrrolo[2,3-d:5,4-d']bisthiazole.

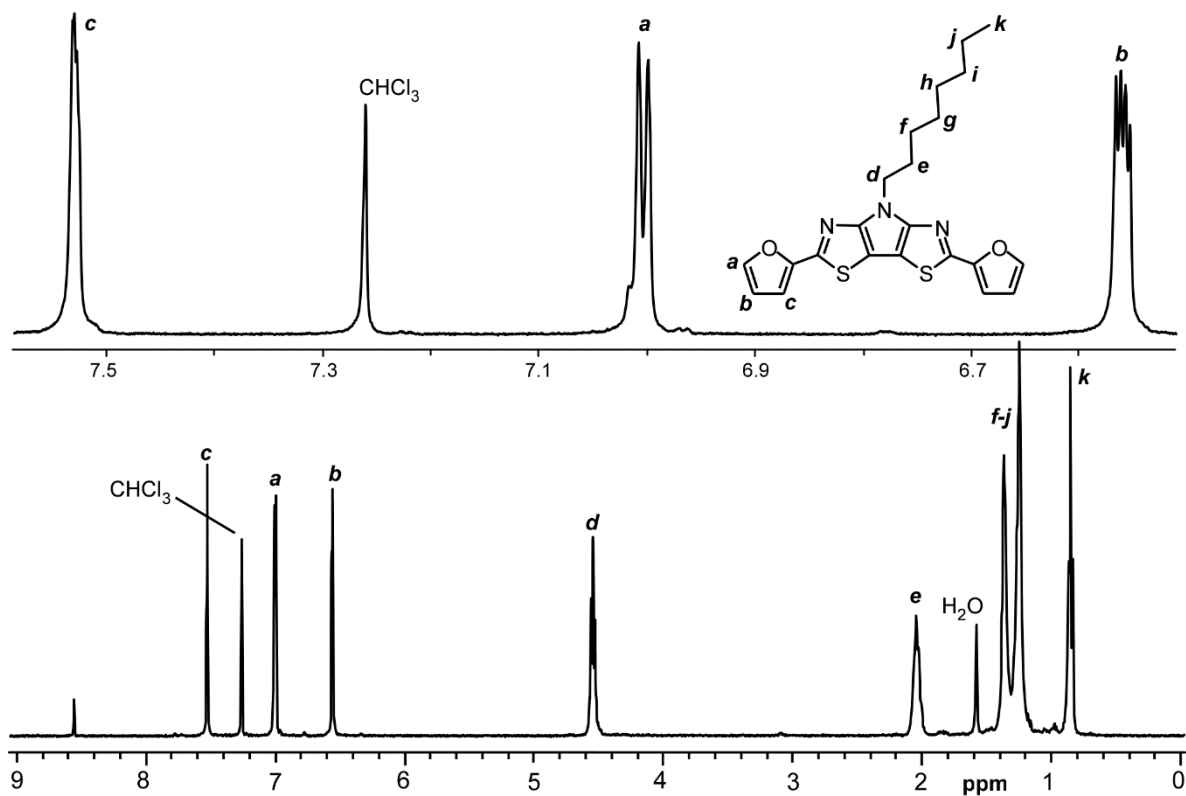

Figure S9. <sup>1</sup>H NMR Spectrum of 2,6-bis(2-furyl)-4-octyl-4H-pyrrolo[2,3-d:5,4-d']bisthiazole.

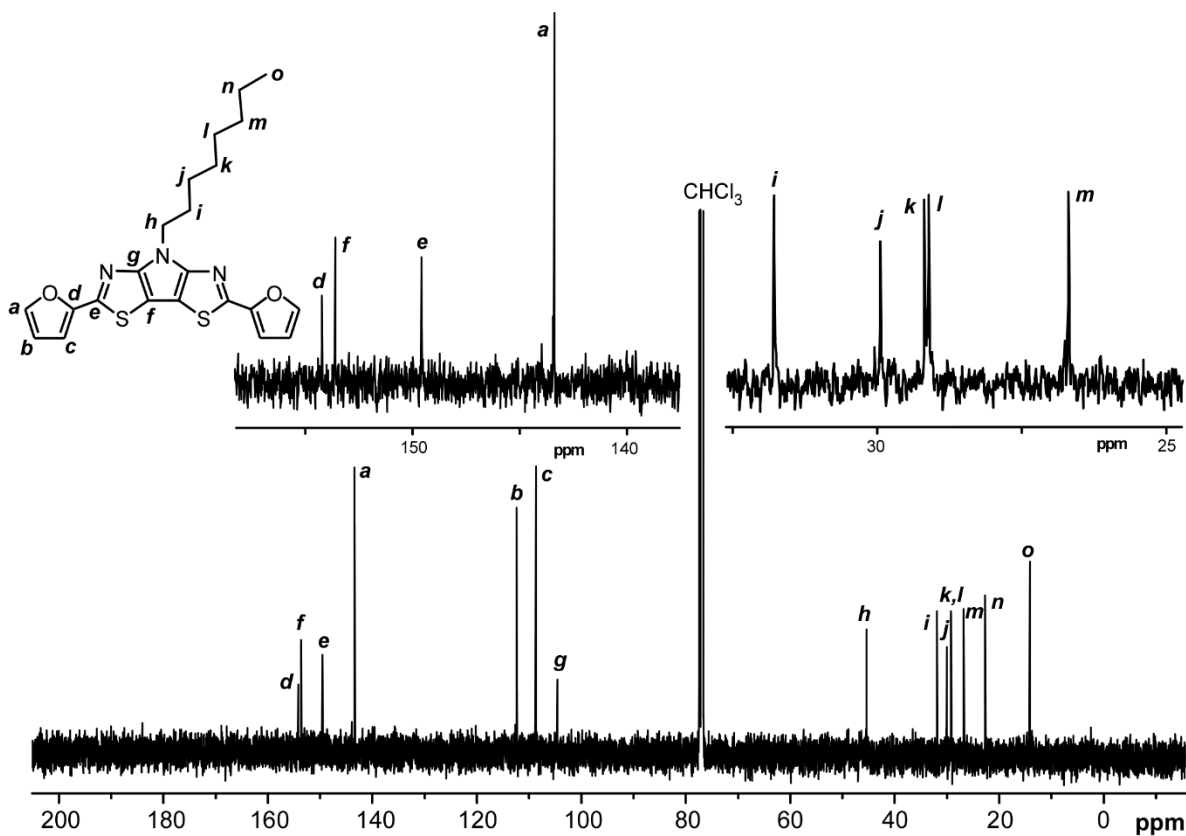

Figure S10. <sup>13</sup>C NMR Spectrum of 2,6-bis(2-furyl)-4-octyl-4H-pyrrolo[2,3-d:5,4-d']bisthiazole.

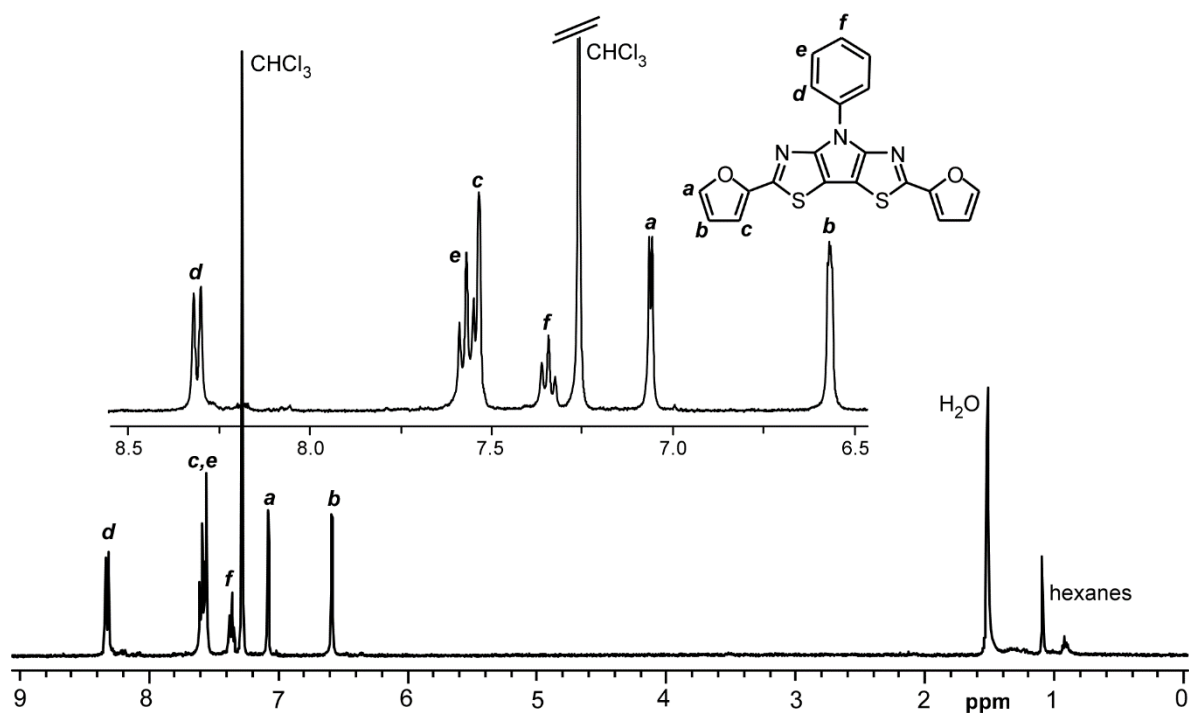

**Figure S11.**  $^1\text{H}$  NMR Spectrum of 2,6-bis(2-furyl)-4-phenyl-4H-pyrrolo[2,3-*d*:5,4-*d'*]bisthiazole.

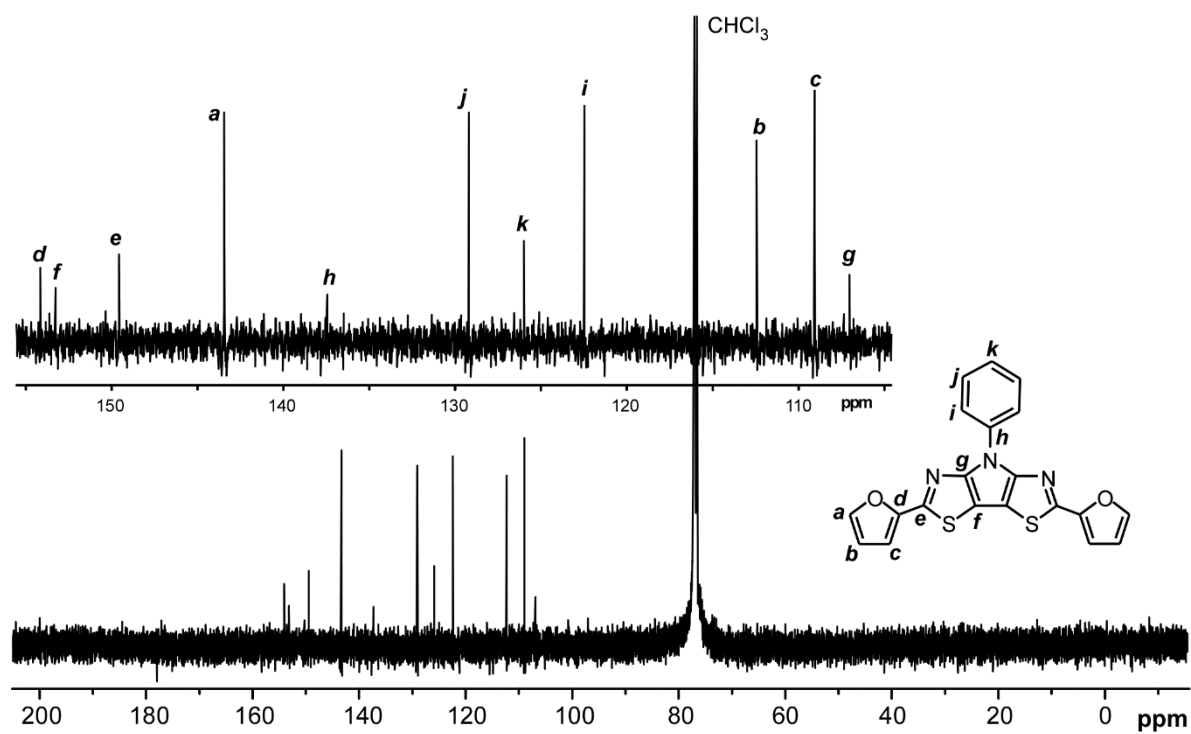

**Figure S12.**  $^{13}\text{C}$  NMR Spectrum of 2,6-bis(2-furyl)-4-phenyl-4H-pyrrolo[2,3-*d*:5,4-*d'*]bisthiazole.

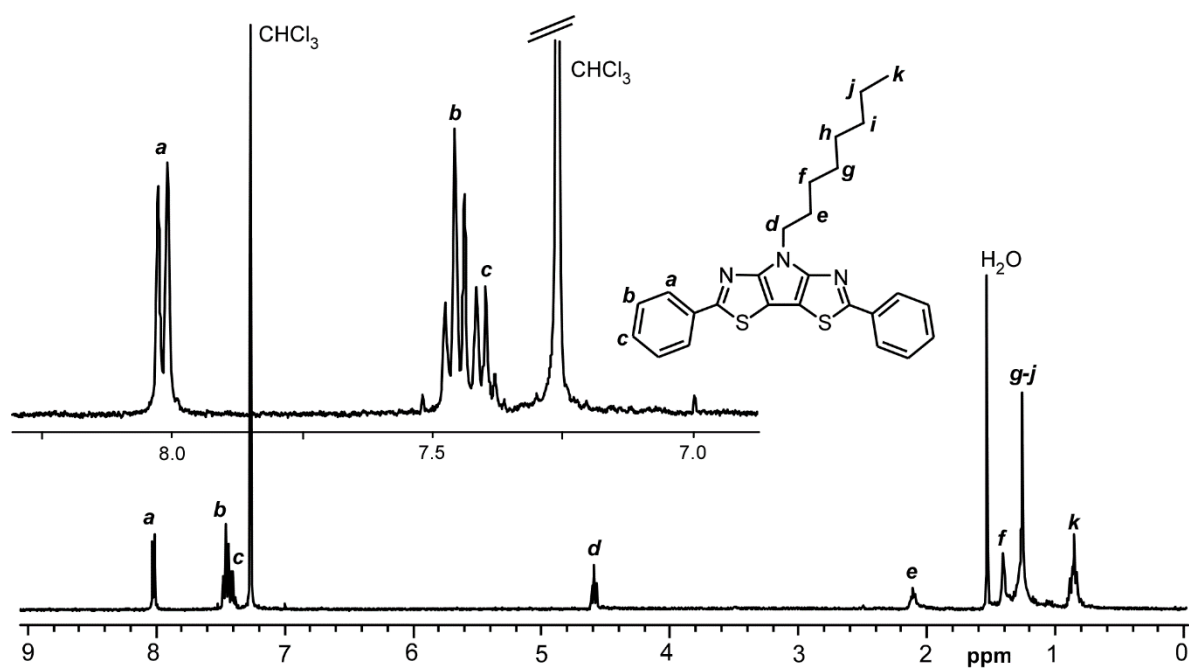

Figure S13. <sup>1</sup>H NMR Spectrum of 4-octyl-2,6-diphenyl-4*H*-pyrrolo[2,3-*d*:5,4-*d'*]bisthiazole.

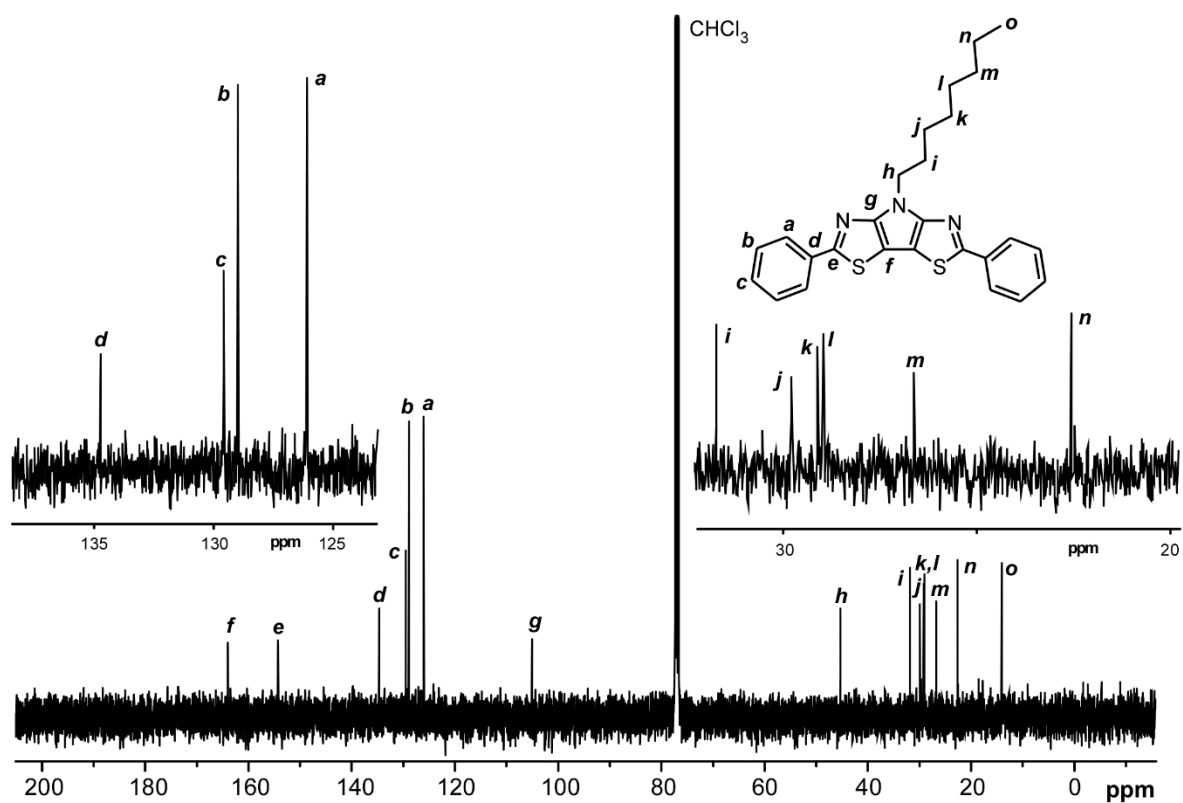

Figure S14. <sup>13</sup>C NMR Spectrum of 4-octyl-2,6-diphenyl-4*H*-pyrrolo[2,3-*d*:5,4-*d'*]bisthiazole.

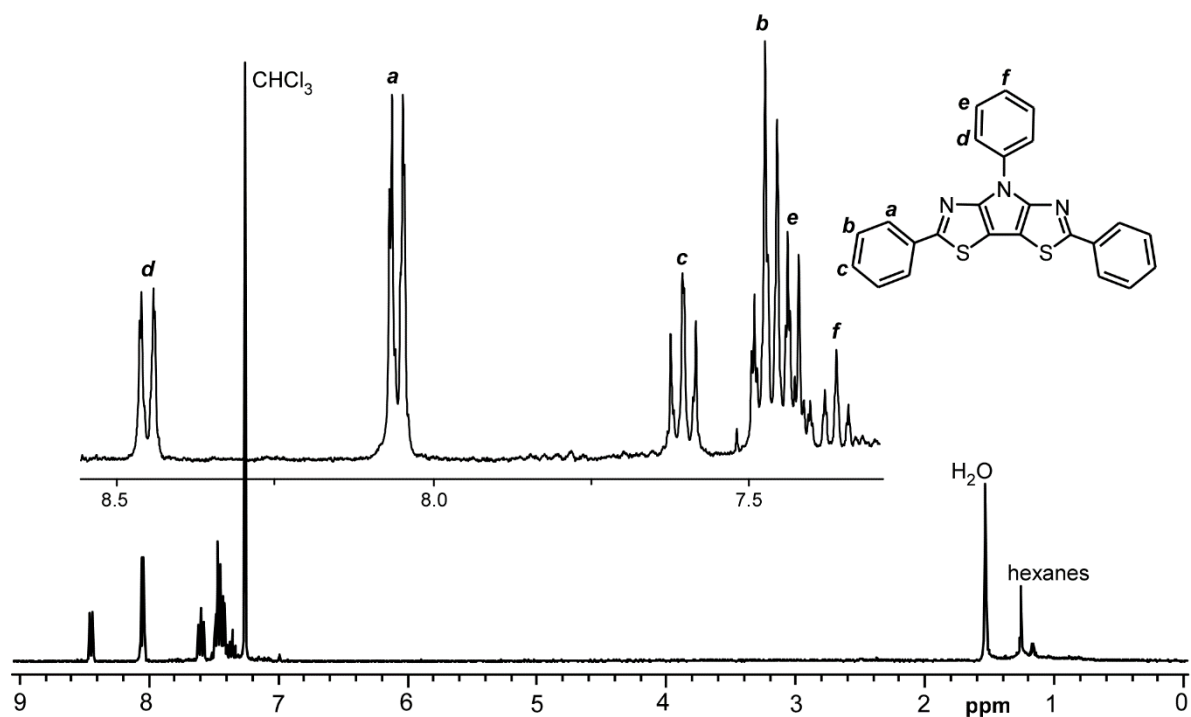

Figure S15. <sup>1</sup>H NMR Spectrum of 2,4,6-triphenyl-4H-pyrrolo[2,3-*d*:5,4-*d'*]bisthiazole.

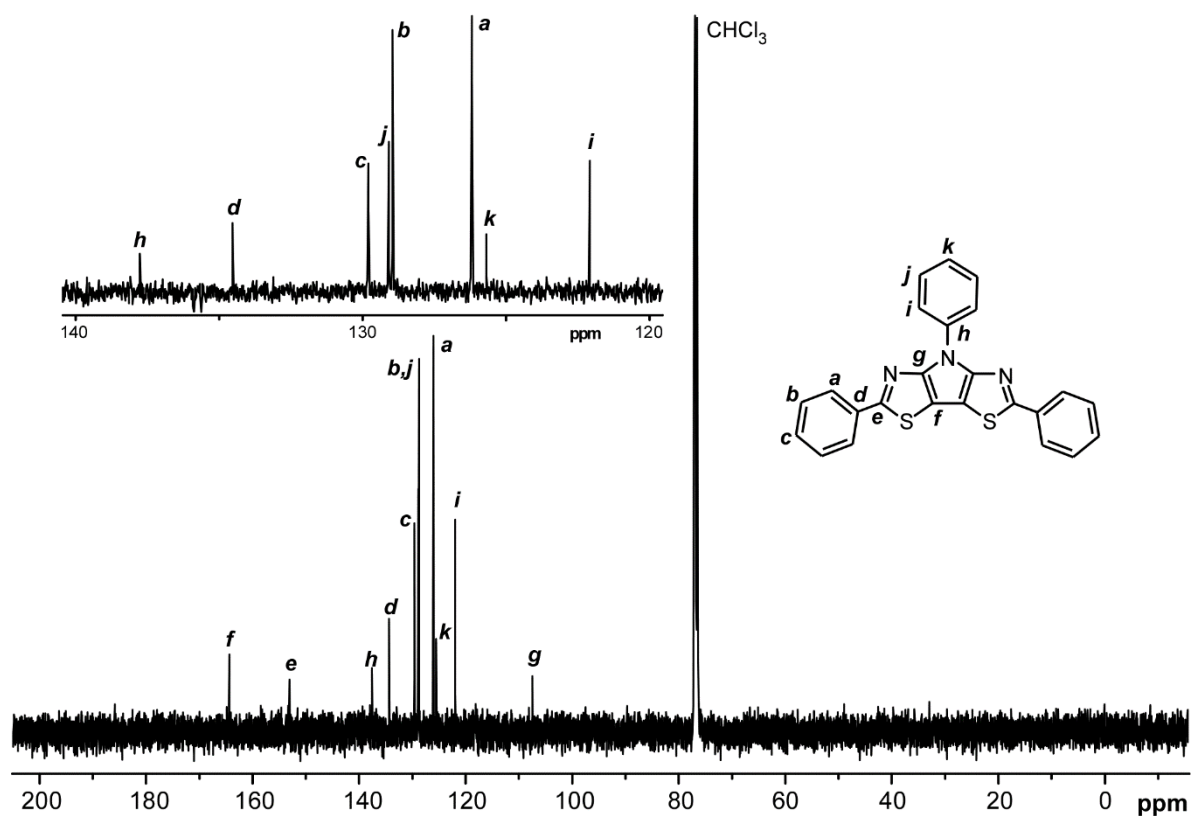

Figure S16. <sup>13</sup>C NMR Spectrum 2,4,6-triphenyl-4H-pyrrolo[2,3-*d*:5,4-*d'*]bisthiazole.



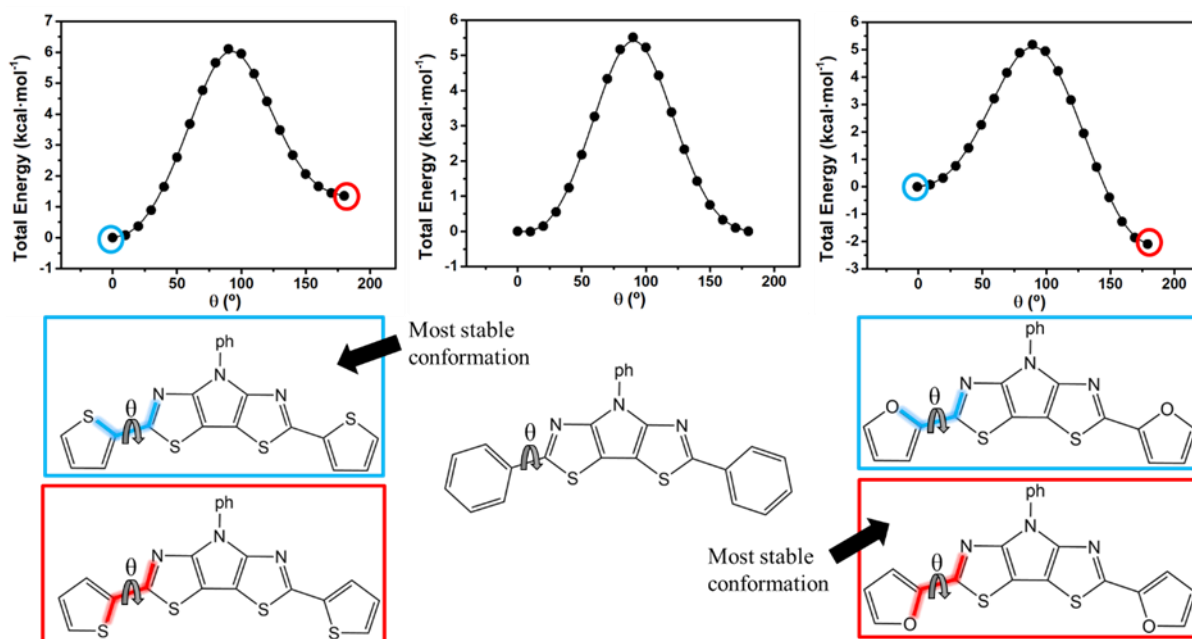

**Figure S17.** Rotational analysis calculated at the B3LYP/6-31G\*\* level.

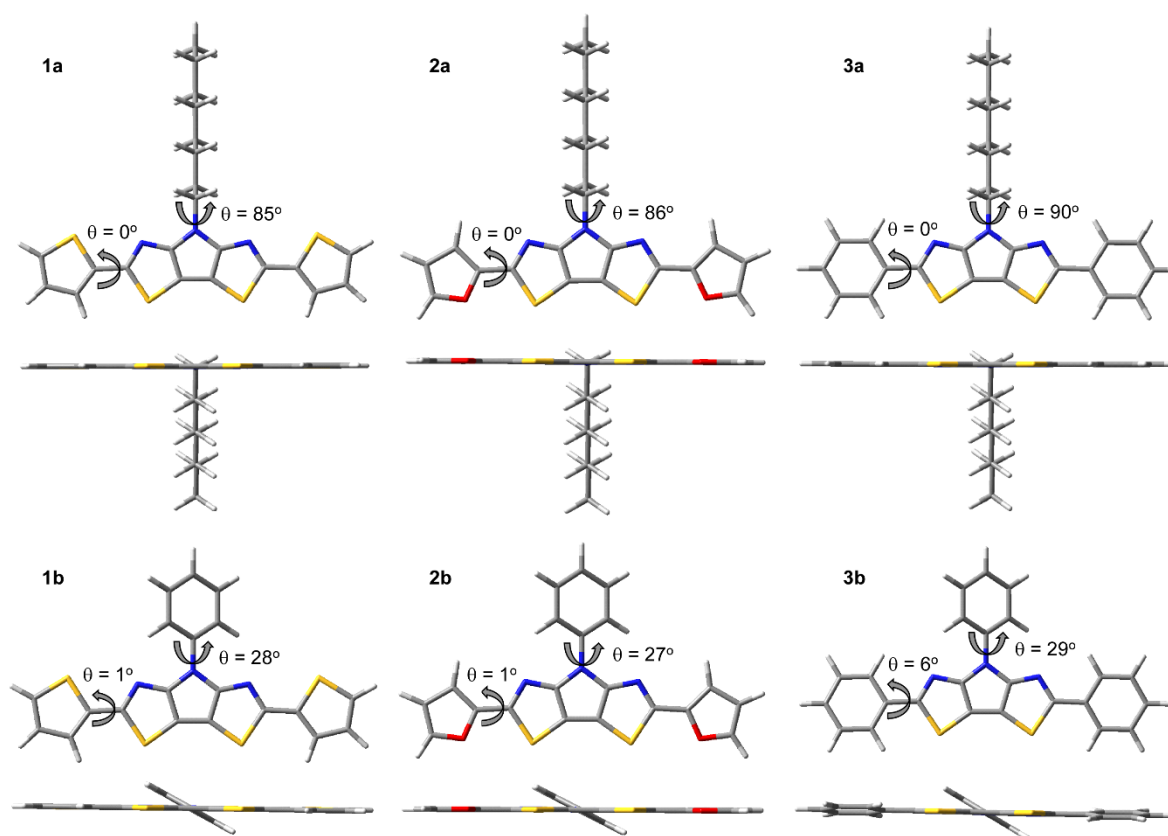

**Figure S18.** Optimized structures calculated at the B3LYP/6-31G\*\* level.

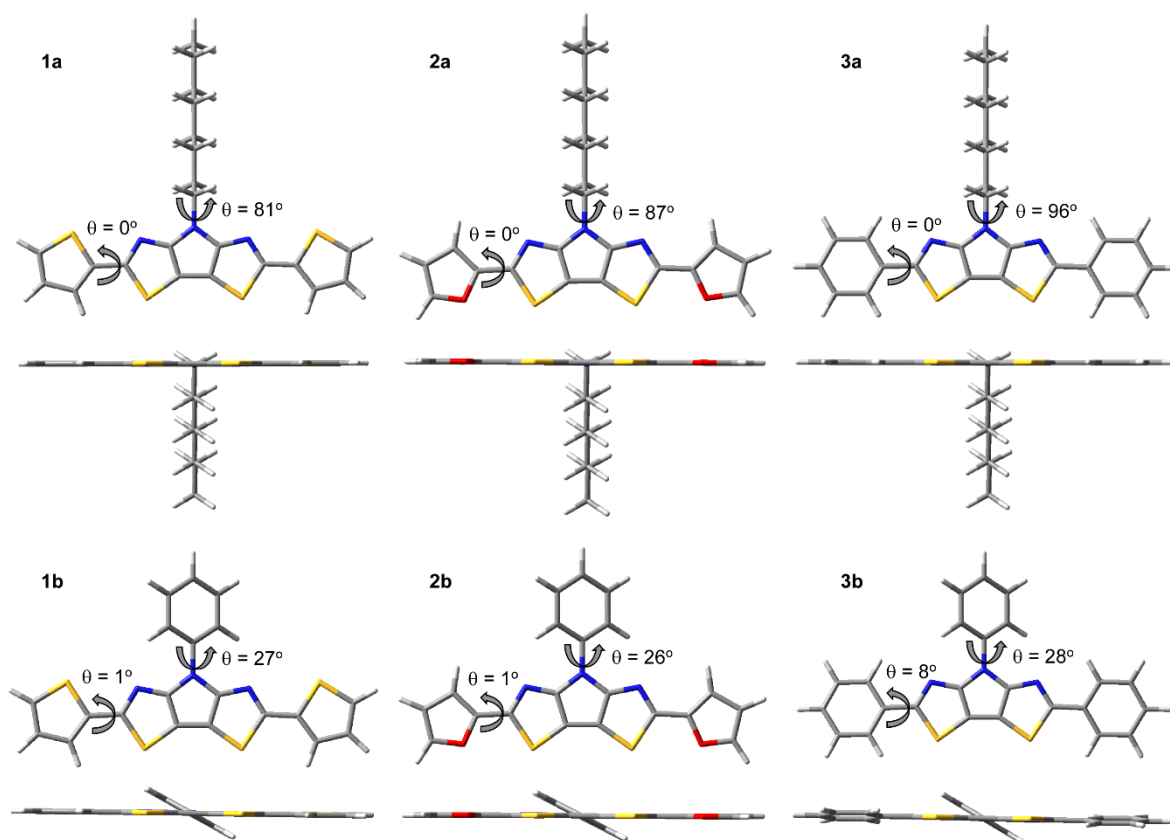

Figure S19. Optimized structures calculated at the CAM-B3LYP/6-31G\*\* level.

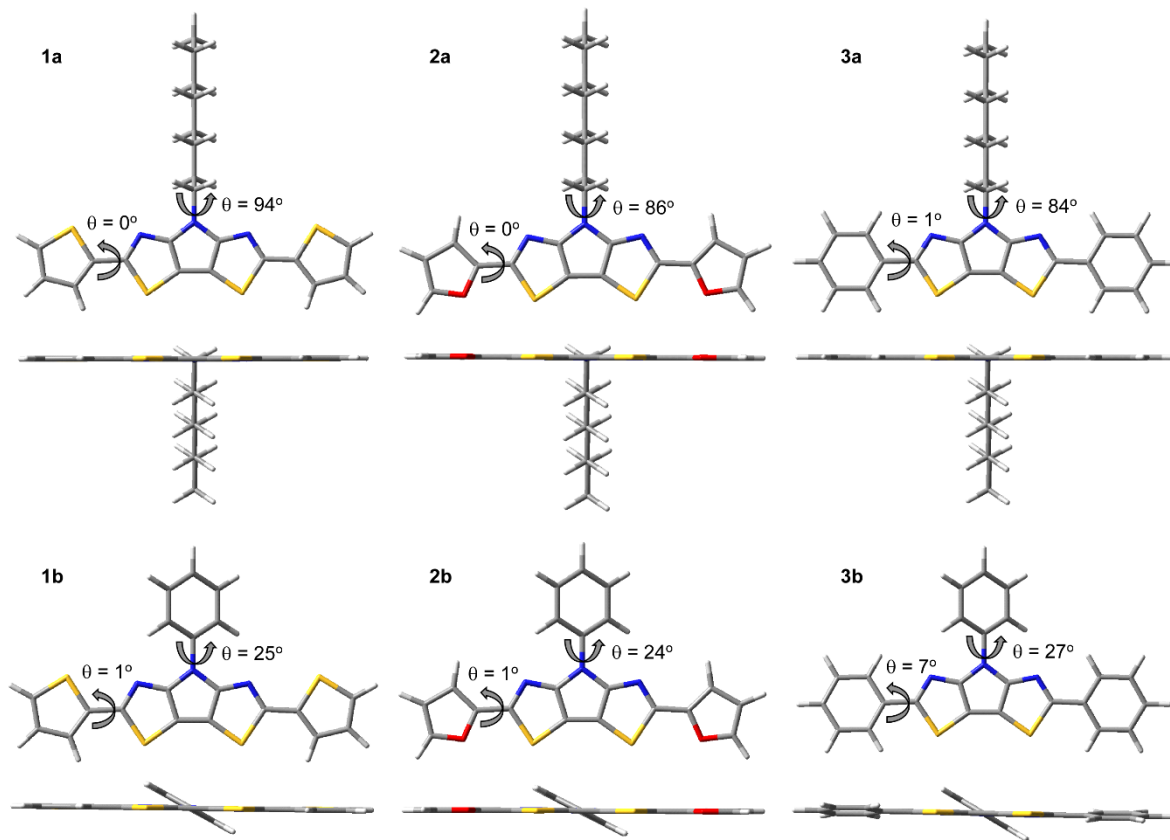

Figure S20. Optimized structures calculated at the PBE0/6-31G\*\* level.

**Table S1.** DFT-calculated frontier orbital energies and vertical ionization potentials at the CAM-B3LYP/6-31G\*\* level.

| Oligomer | HOMO (eV) | LUMO (eV) | Vertical IP (eV) |
|----------|-----------|-----------|------------------|
| 1a       | -6.24     | -0.80     | 6.53 (5.86)      |
| 1b       | -6.39     | -0.92     | 6.65 (5.99)      |
| 2a       | -6.14     | -0.56     | 6.46 (5.63)      |
| 2b       | -6.30     | -0.71     | 6.59 (5.84)      |
| 3a       | -6.33     | -0.63     | 7.53 (6.76)      |
| 3b       | -6.50     | -0.75     | 7.37 (6.63)      |

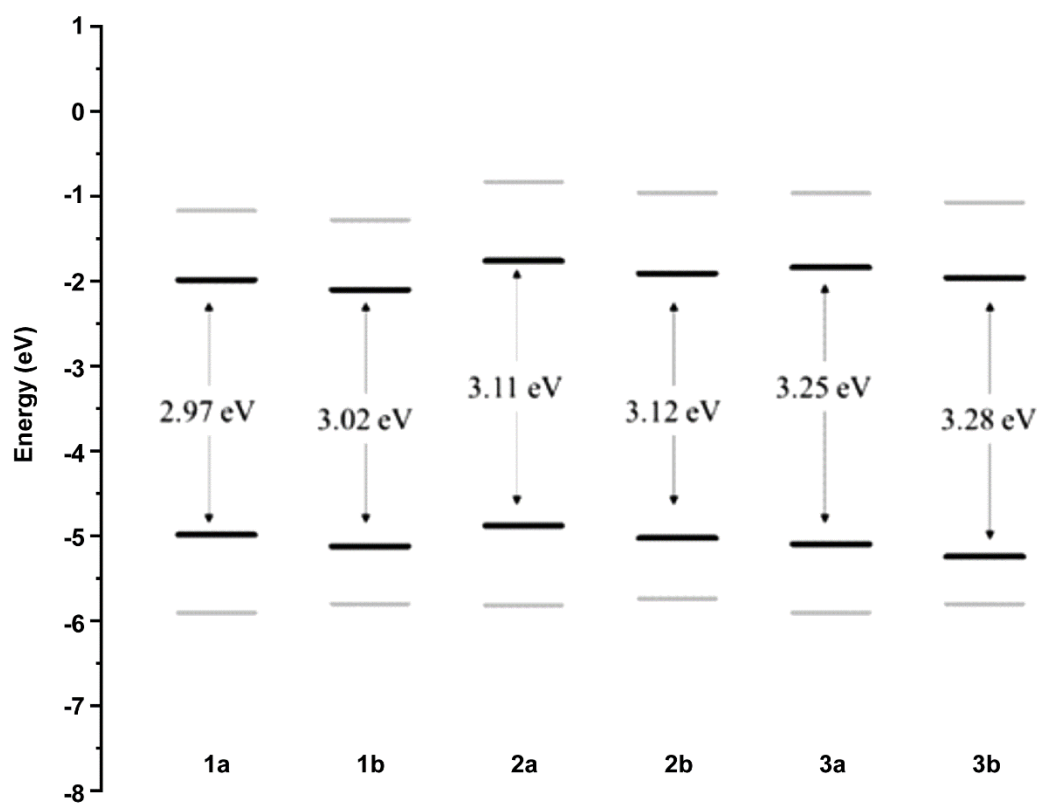

**Figure S21.** Frontier orbital energies calculated at the B3LYP/6-31G\*\* level. The HOMO-LUMO gap values are also shown.

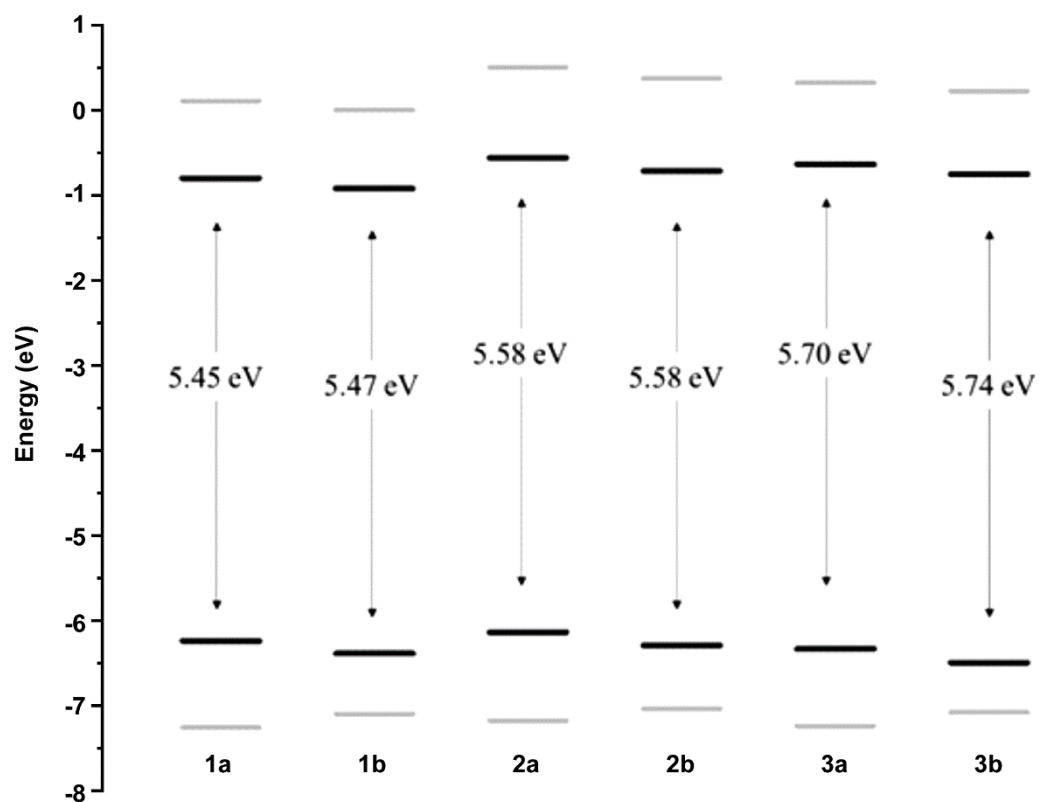

Figure S22. Frontier orbital energies calculated at the CAM-B3LYP/6-31G\*\* level. The HOMO-LUMO gap values are also shown.

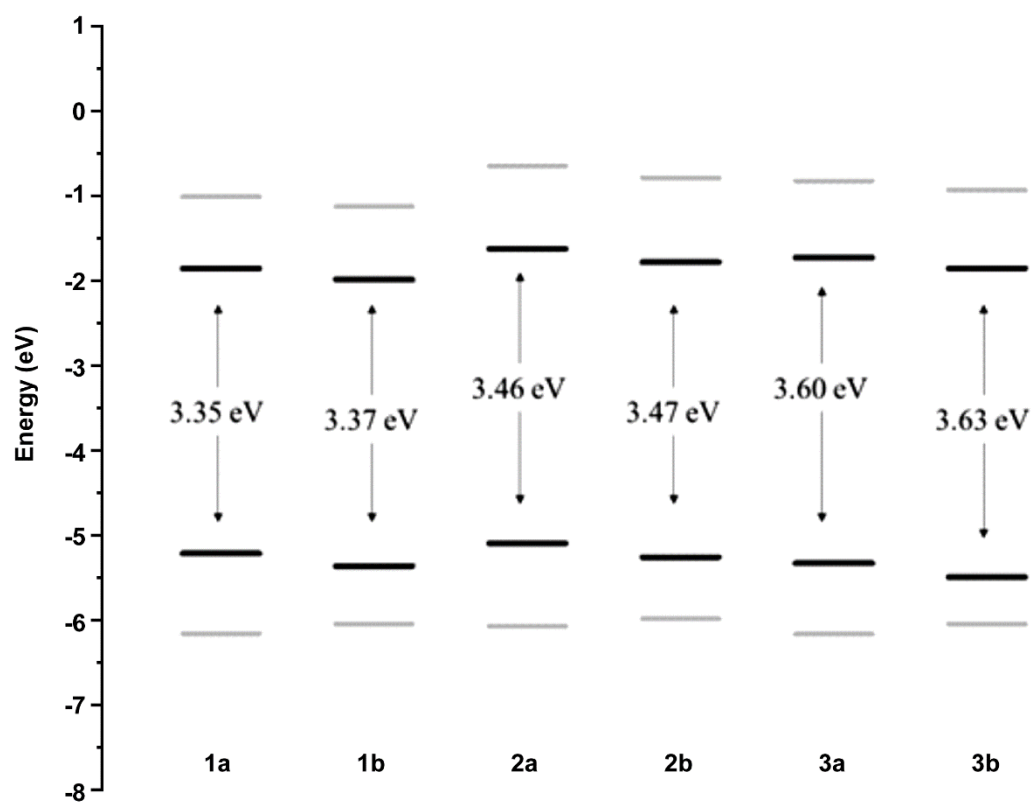

Figure S23. Frontier orbital energies calculated at the PBE0/6-31G\*\* level. The HOMO-LUMO gap values are also shown.

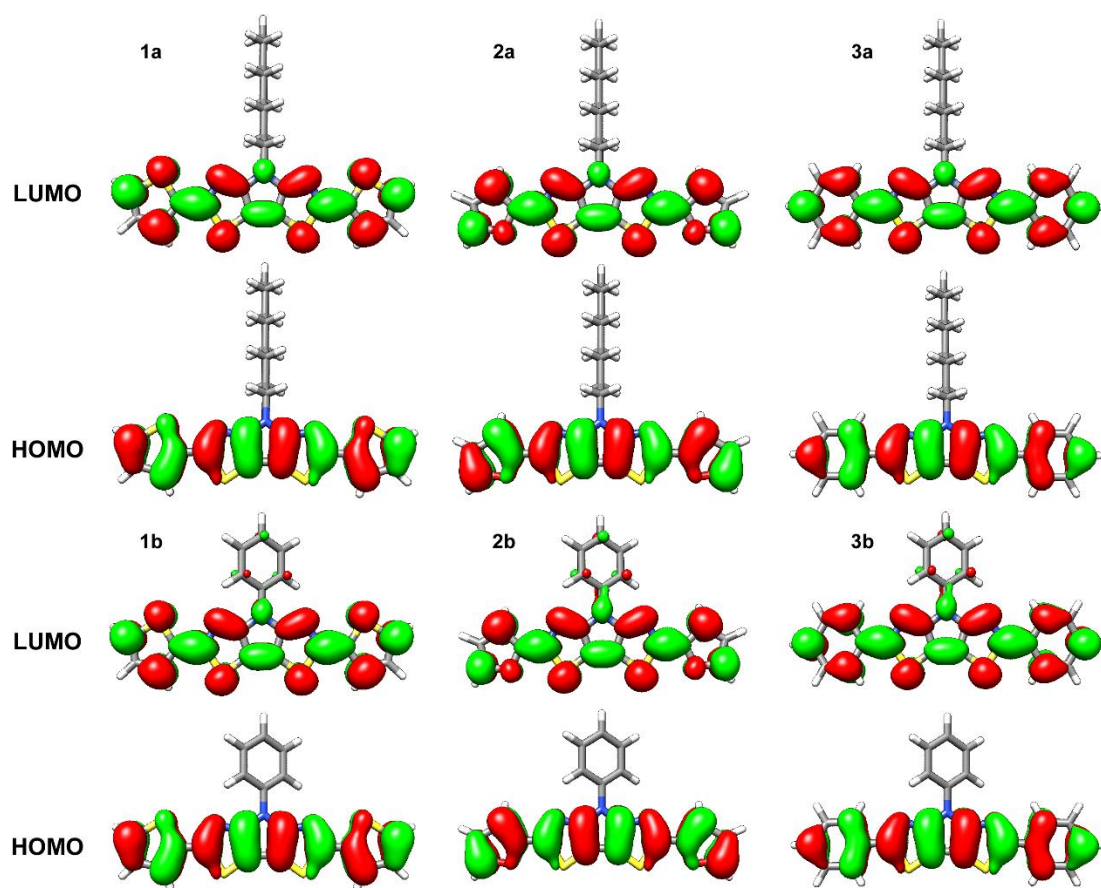

Figure S24. Molecular orbital topologies calculated at the B3LYP/6-31G\*\* level.

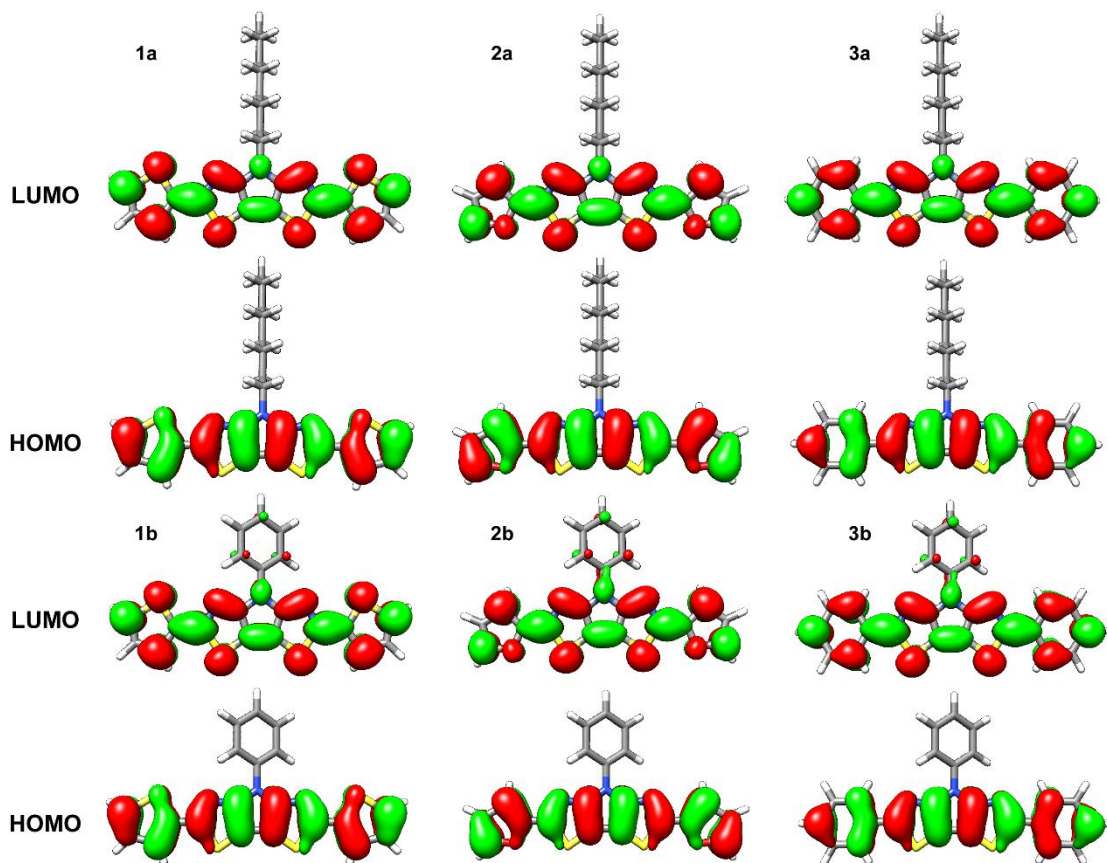

Figure S25. Molecular orbital topologies calculated at the CAM-B3LYP/6-31G\*\* level.

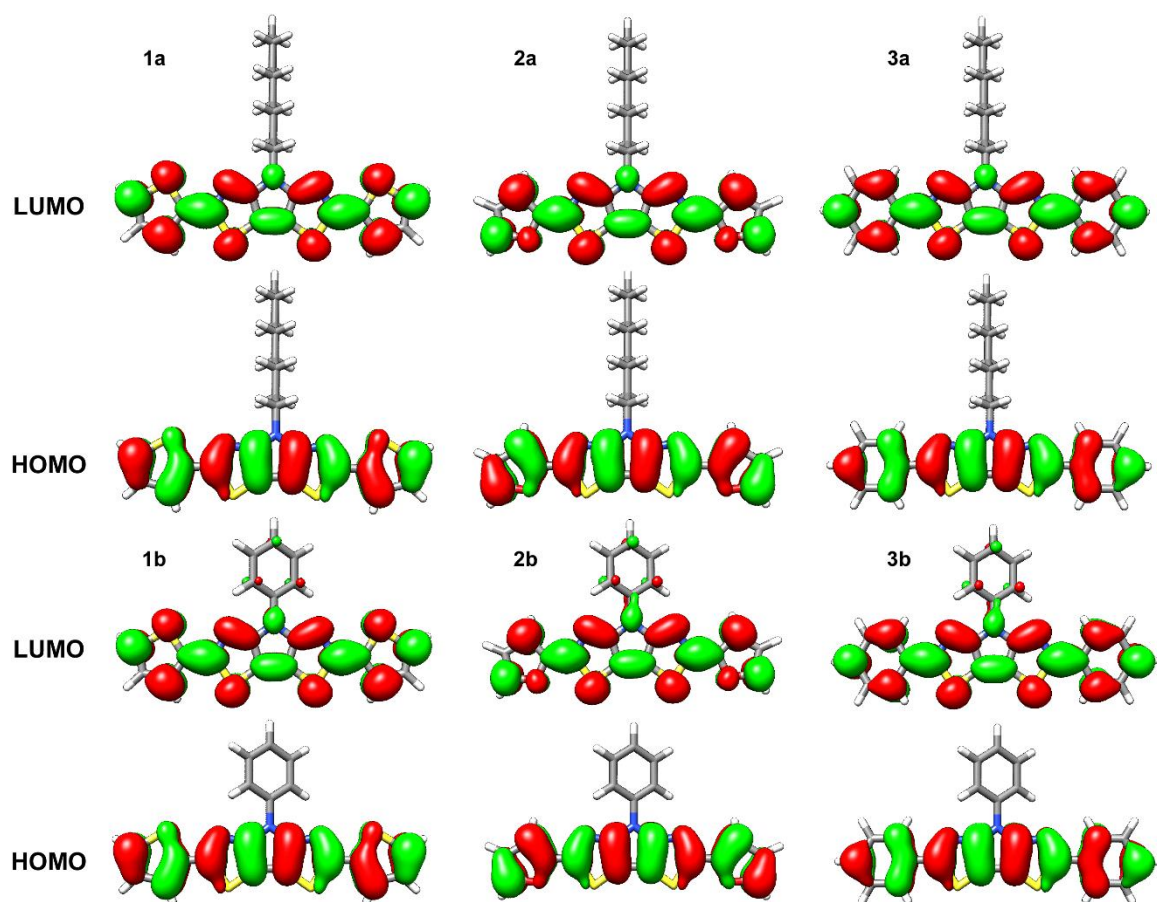

Figure S26. Molecular orbital topologies calculated at the PBE0/6-31G\*\* level.

Table S2. DFT-calculated vertical excitation energies at the B3LYP/6-31G\*\* and CAM-B3LYP/6-31G\*\* levels.

| Oligomer | B3LYP/6-31G**         |      |                  | CAM-B3LYP/6-31G**     |      |                 |
|----------|-----------------------|------|------------------|-----------------------|------|-----------------|
|          | $E_{\text{max}}$ (eV) | $f$  | Description      | $E_{\text{max}}$ (eV) | $f$  | Description     |
| 1a       | 2.85                  | 1.26 | HOMO→LUMO (100%) | 3.32                  | 1.25 | HOMO→LUMO (94%) |
| 1b       | 2.86                  | 1.21 | HOMO→LUMO (100%) | 3.33                  | 1.22 | HOMO→LUMO (94%) |
| 2a       | 3.00                  | 1.30 | HOMO→LUMO (100%) | 3.44                  | 1.30 | HOMO→LUMO (95%) |
| 2b       | 2.99                  | 1.24 | HOMO→LUMO (100%) | 3.44                  | 1.26 | HOMO→LUMO (95%) |
| 3a       | 3.05                  | 1.31 | HOMO→LUMO (100%) | 3.52                  | 1.30 | HOMO→LUMO (95%) |
| 3b       | 3.07                  | 1.25 | HOMO→LUMO (100%) | 3.54                  | 1.25 | HOMO→LUMO (95%) |



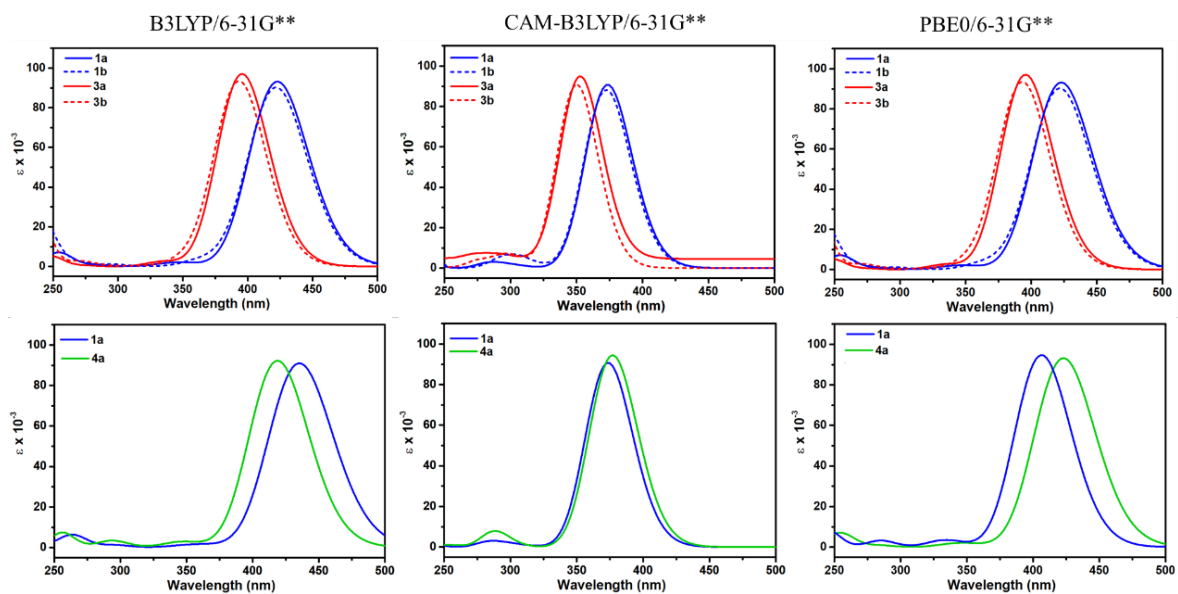

Figure S27. Simulated UV-visible spectra at B3LYP/6-31G\*\*, CAM-B3LYP/6-31G\*\* and PBE0/6-31G\*\* levels.

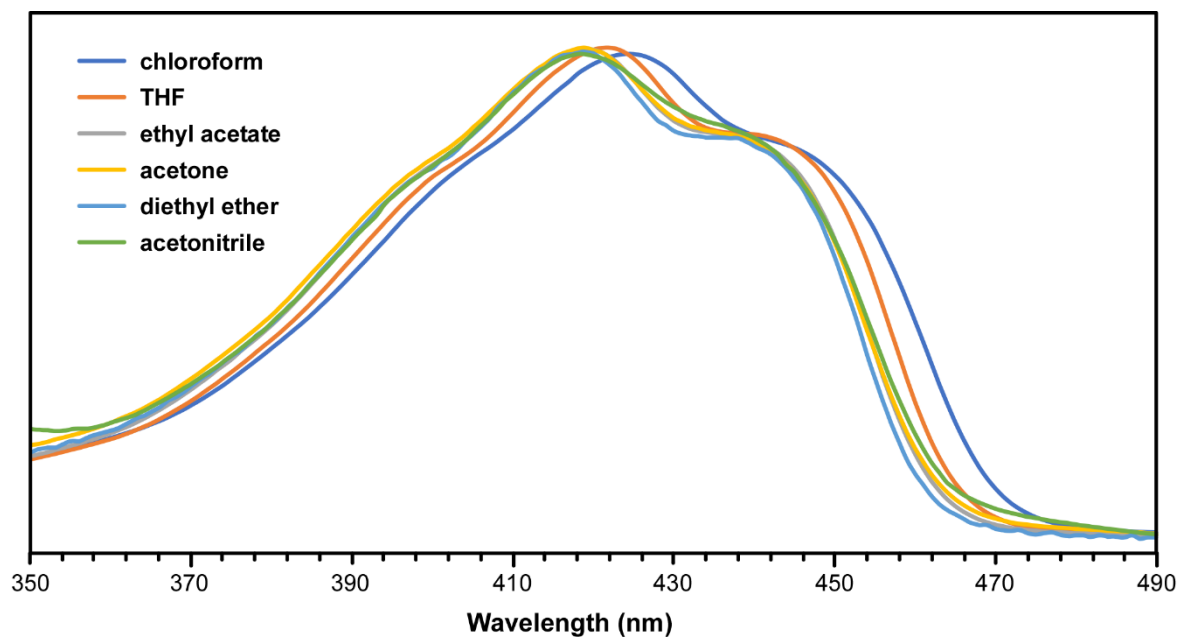

Figure S28. Solution UV-visible spectra of **1a** in various solvents.
